# Supplementary material
Source: publisher figshare collection journal article supplement (https://gsajournals.figshare.com/ndownloader/files/24213536)
Supplement: Supplementary file 1 [file 24213536]

## Sheet: Caption
TABLE S1
Sheets 1:6. Different SNP sets generated by clumping and their PRS values. Effect sizes from 361K European ancestry individuals from the UK Biobank. Nr: Number of SNPs. Part_R2: Partial-R2, displayed as percentage.
Name: name of sets of SNPs according to pruning/clumping strategy (physical or genetic or LD windows, LD blocks)
Sheet 1: Women's Health Initiative (WHI)
Sheet 2: Jackson Heart Study (WHI)
Sheet 3: UK Biobank (subset with African ancestry)
Sheet 4: UK Biobank (subset with European ancestry)
Sheet 5: Health and Retirement Study (subset with African Ancestry)
Sheet 6: Health and Retirement Study (subset with European Ancestry)
Sheets 7:12. Different SNP sets generated by clumping and their PRS values. Effect sizes estimated from ‘White British’ sibling pairs from the
UK Biobank. Data from genotype arrays. Nr: Number of SNPs. Part_R2: Partial-R2, displayed as percentage. Name: name of sets of SNPs according to pruning/clumping strategy (physical or genetic or LD windows, LD blocks)
Sheet 7: Women's Health Initiative (WHI)
Sheet 8: Jackson Heart Study (WHI)
Sheet 9: UK Biobank (subset with African ancestry)
Sheet 10: UK Biobank (subset with European ancestry)
Sheet 11: Health and Retirement Study (subset with African Ancestry)
Sheet 12: Health and Retirement Study (subset with European Ancestry)
Sheet 13. Different SNP sets generated by clumping and their PRS values. Data from imputed datasets.
Sheets 14:19. Different SNP sets generated by clumping and their unweighted PRS values.
Sheet 14: Women's Health Initiative (WHI)
Sheet 15: Jackson Heart Study (WHI)
Sheet 16: UK Biobank (subset with African ancestry)
Sheet 17: UK Biobank (subset with European ancestry)
Sheet 18: Health and Retirement Study (subset with African Ancestry)
Sheet 19: Health and Retirement Study (subset with European Ancestry)
Sheet 20. Difference between PRS values for 1000G super-populations (Africa, Europe) for different sets of SNPs.
diff_PRS_EUR_AFR: difference between average PRS for EUR and AFR 1000 Genomes super-populations
Names of sets of SNPs follow the format xxx_yyy_zzz_www.
XXX: Type of window (physical, genetic, LD) or LD blocks (AFR or EUR) used. Written as "phys", "genet', "LD" or "LD_block_0_0_[AFR|EUR]
yyy: size of window. If window is physical or LD, size is in Kb, if genetic, size is in cM; if LD_block, window size does not apply.
zzz: p-value threshold.
www: only applicable to LD windows. It is the r2 thresold.

## Sheet: 1
Nr	Name	Part_R2	Dataset
678	phys_1000000_0.00000005	0.0334404	WHI_afr
906	phys_500000_0.00000005	0.0347576	WHI_afr
2041	phys_100000_0.00000005	0.0343391	WHI_afr
2430	phys_75000_0.00000005	0.0324771	WHI_afr
3129	phys_50000_0.00000005	0.0341265	WHI_afr
4724	phys_25000_0.00000005	0.0343107	WHI_afr
7445	phys_10000_0.00000005	0.0351529	WHI_afr
9624	phys_5000_0.00000005	0.0356434	WHI_afr
917	genet_1_0.00000005	0.0340116	WHI_afr
1257	genet_0.5_0.00000005	0.0326901	WHI_afr
1634	genet_0.3_0.00000005	0.0339952	WHI_afr
1730	genet_0.25_0.00000005	0.0330427	WHI_afr
1909	genet_0.2_0.00000005	0.031186	WHI_afr
2317	genet_0.15_0.00000005	0.0347789	WHI_afr
2854	genet_0.1_0.00000005	0.0313231	WHI_afr
771	phys_1000000_0.0000005	0.0346389	WHI_afr
1073	phys_500000_0.0000005	0.0357203	WHI_afr
2472	phys_100000_0.0000005	0.0354197	WHI_afr
2924	phys_75000_0.0000005	0.033942	WHI_afr
3764	phys_50000_0.0000005	0.035365	WHI_afr
5712	phys_25000_0.0000005	0.0360199	WHI_afr
9005	phys_10000_0.0000005	0.0371384	WHI_afr
11651	phys_5000_0.0000005	0.0376965	WHI_afr
1067	genet_1_0.0000005	0.0350662	WHI_afr
1524	genet_0.5_0.0000005	0.0337456	WHI_afr
1962	genet_0.3_0.0000005	0.0344506	WHI_afr
2086	genet_0.25_0.0000005	0.033375	WHI_afr
2314	genet_0.2_0.0000005	0.0318577	WHI_afr
2802	genet_0.15_0.0000005	0.0360194	WHI_afr
3454	genet_0.1_0.0000005	0.0332888	WHI_afr
916	phys_1000000_0.000005	0.0350358	WHI_afr
1292	phys_500000_0.000005	0.0349926	WHI_afr
3075	phys_100000_0.000005	0.0349929	WHI_afr
3651	phys_75000_0.000005	0.0343859	WHI_afr
4706	phys_50000_0.000005	0.0352516	WHI_afr
7112	phys_25000_0.000005	0.0370357	WHI_afr
11264	phys_10000_0.000005	0.0384659	WHI_afr
14570	phys_5000_0.000005	0.0386636	WHI_afr
1292	genet_1_0.000005	0.0347124	WHI_afr
1860	genet_0.5_0.000005	0.0337747	WHI_afr
2432	genet_0.3_0.000005	0.0339241	WHI_afr
2576	genet_0.25_0.000005	0.0329171	WHI_afr
2871	genet_0.2_0.000005	0.0315993	WHI_afr
3447	genet_0.15_0.000005	0.0356559	WHI_afr
4264	genet_0.1_0.000005	0.0331277	WHI_afr
1105	phys_1000000_0.00005	0.0350231	WHI_afr
1638	phys_500000_0.00005	0.035009	WHI_afr
4024	phys_100000_0.00005	0.0363008	WHI_afr
4777	phys_75000_0.00005	0.0362778	WHI_afr
6129	phys_50000_0.00005	0.0374955	WHI_afr
9269	phys_25000_0.00005	0.0399381	WHI_afr
14783	phys_10000_0.00005	0.042428	WHI_afr
19192	phys_5000_0.00005	0.0418488	WHI_afr
1620	genet_1_0.00005	0.0342381	WHI_afr
2405	genet_0.5_0.00005	0.0336513	WHI_afr
3157	genet_0.3_0.00005	0.0339745	WHI_afr
3343	genet_0.25_0.00005	0.0333999	WHI_afr
3719	genet_0.2_0.00005	0.0324607	WHI_afr
4485	genet_0.15_0.00005	0.0380713	WHI_afr
5567	genet_0.1_0.00005	0.0357411	WHI_afr
1377	phys_1000000_0.0005	0.034087	WHI_afr
2171	phys_500000_0.0005	0.0304054	WHI_afr
5744	phys_100000_0.0005	0.0357892	WHI_afr
6804	phys_75000_0.0005	0.0355911	WHI_afr
8765	phys_50000_0.0005	0.0383333	WHI_afr
13205	phys_25000_0.0005	0.0415386	WHI_afr
21106	phys_10000_0.0005	0.0441593	WHI_afr
27422	phys_5000_0.0005	0.0438741	WHI_afr
2135	genet_1_0.0005	0.0319348	WHI_afr
3327	genet_0.5_0.0005	0.0322158	WHI_afr
4434	genet_0.3_0.0005	0.032695	WHI_afr
4720	genet_0.25_0.0005	0.0328012	WHI_afr
5249	genet_0.2_0.0005	0.0317953	WHI_afr
6340	genet_0.15_0.0005	0.0383071	WHI_afr
7860	genet_0.1_0.0005	0.0366877	WHI_afr
51826	LD_250000_0.01_0.5	0.0449558	WHI_afr
53136	LD_100000_0.01_0.5	0.0455896	WHI_afr
55718	LD_50000_0.01_0.5	0.0455032	WHI_afr
2596	LD_block_0_0_AFR	0.0277696	WHI_afr
1709	LD_block_0_0_EUR	0.0346281	WHI_afr

## Sheet: 2
Nr	Name	Part_R2	Dataset
670	phys_1000000_0.00000005	0.0234846	JHS_afr
896	phys_500000_0.00000005	0.030941	JHS_afr
2008	phys_100000_0.00000005	0.0269014	JHS_afr
2386	phys_75000_0.00000005	0.0261227	JHS_afr
3064	phys_50000_0.00000005	0.0230288	JHS_afr
4596	phys_25000_0.00000005	0.0213656	JHS_afr
7195	phys_10000_0.00000005	0.0246441	JHS_afr
9244	phys_5000_0.00000005	0.0246803	JHS_afr
905	genet_1_0.00000005	0.0212888	JHS_afr
1238	genet_0.5_0.00000005	0.0190005	JHS_afr
1608	genet_0.3_0.00000005	0.024183	JHS_afr
1700	genet_0.25_0.00000005	0.0217049	JHS_afr
1880	genet_0.2_0.00000005	0.0205052	JHS_afr
2279	genet_0.15_0.00000005	0.023097	JHS_afr
2809	genet_0.1_0.00000005	0.0183819	JHS_afr
760	phys_1000000_0.0000005	0.0241604	JHS_afr
1060	phys_500000_0.0000005	0.0327833	JHS_afr
2436	phys_100000_0.0000005	0.030569	JHS_afr
2884	phys_75000_0.0000005	0.0305467	JHS_afr
3696	phys_50000_0.0000005	0.0270414	JHS_afr
5559	phys_25000_0.0000005	0.0246188	JHS_afr
8692	phys_10000_0.0000005	0.0269975	JHS_afr
11176	phys_5000_0.0000005	0.0272416	JHS_afr
1055	genet_1_0.0000005	0.0232771	JHS_afr
1496	genet_0.5_0.0000005	0.0235461	JHS_afr
1932	genet_0.3_0.0000005	0.0275706	JHS_afr
2056	genet_0.25_0.0000005	0.0253829	JHS_afr
2287	genet_0.2_0.0000005	0.0249452	JHS_afr
2762	genet_0.15_0.0000005	0.0277586	JHS_afr
3402	genet_0.1_0.0000005	0.021733	JHS_afr
900	phys_1000000_0.000005	0.0277009	JHS_afr
1276	phys_500000_0.000005	0.0349692	JHS_afr
3030	phys_100000_0.000005	0.0354954	JHS_afr
3600	phys_75000_0.000005	0.0351731	JHS_afr
4614	phys_50000_0.000005	0.0321468	JHS_afr
6929	phys_25000_0.000005	0.0305827	JHS_afr
10873	phys_10000_0.000005	0.0322427	JHS_afr
13982	phys_5000_0.000005	0.0312518	JHS_afr
1277	genet_1_0.000005	0.0268684	JHS_afr
1829	genet_0.5_0.000005	0.0277917	JHS_afr
2398	genet_0.3_0.000005	0.0334763	JHS_afr
2539	genet_0.25_0.000005	0.0327134	JHS_afr
2836	genet_0.2_0.000005	0.0311911	JHS_afr
3393	genet_0.15_0.000005	0.0345387	JHS_afr
4194	genet_0.1_0.000005	0.0289177	JHS_afr
1094	phys_1000000_0.00005	0.0291101	JHS_afr
1620	phys_500000_0.00005	0.0382692	JHS_afr
3979	phys_100000_0.00005	0.0396492	JHS_afr
4736	phys_75000_0.00005	0.0393987	JHS_afr
6041	phys_50000_0.00005	0.0368189	JHS_afr
9065	phys_25000_0.00005	0.0358277	JHS_afr
14293	phys_10000_0.00005	0.0363493	JHS_afr
18455	phys_5000_0.00005	0.0359139	JHS_afr
1605	genet_1_0.00005	0.0282272	JHS_afr
2376	genet_0.5_0.00005	0.0285827	JHS_afr
3128	genet_0.3_0.00005	0.0385202	JHS_afr
3312	genet_0.25_0.00005	0.0357334	JHS_afr
3685	genet_0.2_0.00005	0.0359676	JHS_afr
4430	genet_0.15_0.00005	0.0391259	JHS_afr
5490	genet_0.1_0.00005	0.0347193	JHS_afr
1364	phys_1000000_0.0005	0.028692	JHS_afr
2156	phys_500000_0.0005	0.0307086	JHS_afr
5676	phys_100000_0.0005	0.0382532	JHS_afr
6726	phys_75000_0.0005	0.0385206	JHS_afr
8637	phys_50000_0.0005	0.036276	JHS_afr
12938	phys_25000_0.0005	0.0377185	JHS_afr
20456	phys_10000_0.0005	0.042693	JHS_afr
26399	phys_5000_0.0005	0.0415774	JHS_afr
2119	genet_1_0.0005	0.0255239	JHS_afr
3286	genet_0.5_0.0005	0.0263231	JHS_afr
4387	genet_0.3_0.0005	0.0353138	JHS_afr
4671	genet_0.25_0.0005	0.0333423	JHS_afr
5200	genet_0.2_0.0005	0.0335065	JHS_afr
6262	genet_0.15_0.0005	0.0378952	JHS_afr
7754	genet_0.1_0.0005	0.036121	JHS_afr
50535	LD_250000_0.01_0.5	0.00182885	JHS_afr
51784	LD_100000_0.01_0.5	0.00165166	JHS_afr
54214	LD_50000_0.01_0.5	0.00148358	JHS_afr
2586	LD_block_0_0_AFR	0.0362998	JHS_afr
1703	LD_block_0_0_EUR	0.0259028	JHS_afr

## Sheet: 3
Nr	Name	Part_R2	Dataset
677	phys_1000000_0.00000005	0.0237795	UKB_afr
921	phys_500000_0.00000005	0.0275876	UKB_afr
2104	phys_100000_0.00000005	0.0319947	UKB_afr
2464	phys_75000_0.00000005	0.0347713	UKB_afr
3066	phys_50000_0.00000005	0.037982	UKB_afr
4286	phys_25000_0.00000005	0.0391544	UKB_afr
6008	phys_10000_0.00000005	0.0355261	UKB_afr
7194	phys_5000_0.00000005	0.0325464	UKB_afr
960	genet_1_0.00000005	0.0273229	UKB_afr
1308	genet_0.5_0.00000005	0.028728	UKB_afr
1707	genet_0.3_0.00000005	0.0310376	UKB_afr
1801	genet_0.25_0.00000005	0.0315991	UKB_afr
1949	genet_0.2_0.00000005	0.0322697	UKB_afr
2336	genet_0.15_0.00000005	0.0339598	UKB_afr
2821	genet_0.1_0.00000005	0.0335255	UKB_afr
772	phys_1000000_0.0000005	0.0240163	UKB_afr
1082	phys_500000_0.0000005	0.0285772	UKB_afr
2541	phys_100000_0.0000005	0.0341492	UKB_afr
2985	phys_75000_0.0000005	0.0376808	UKB_afr
3718	phys_50000_0.0000005	0.0409321	UKB_afr
5246	phys_25000_0.0000005	0.04239	UKB_afr
7385	phys_10000_0.0000005	0.0393068	UKB_afr
8846	phys_5000_0.0000005	0.0356732	UKB_afr
1102	genet_1_0.0000005	0.0276729	UKB_afr
1558	genet_0.5_0.0000005	0.0300934	UKB_afr
2051	genet_0.3_0.0000005	0.0322793	UKB_afr
2172	genet_0.25_0.0000005	0.0329361	UKB_afr
2357	genet_0.2_0.0000005	0.0336929	UKB_afr
2825	genet_0.15_0.0000005	0.0359432	UKB_afr
3438	genet_0.1_0.0000005	0.0351749	UKB_afr
919	phys_1000000_0.000005	0.0243069	UKB_afr
1311	phys_500000_0.000005	0.0296889	UKB_afr
3146	phys_100000_0.000005	0.0375778	UKB_afr
3725	phys_75000_0.000005	0.0413205	UKB_afr
4633	phys_50000_0.000005	0.0441889	UKB_afr
6581	phys_25000_0.000005	0.0451235	UKB_afr
9320	phys_10000_0.000005	0.0417202	UKB_afr
11178	phys_5000_0.000005	0.0380439	UKB_afr
1333	genet_1_0.000005	0.0294546	UKB_afr
1913	genet_0.5_0.000005	0.0328981	UKB_afr
2517	genet_0.3_0.000005	0.0355989	UKB_afr
2671	genet_0.25_0.000005	0.0362227	UKB_afr
2910	genet_0.2_0.000005	0.0367605	UKB_afr
3492	genet_0.15_0.000005	0.0393145	UKB_afr
4238	genet_0.1_0.000005	0.0386754	UKB_afr
1100	phys_1000000_0.00005	0.023296	UKB_afr
1658	phys_500000_0.00005	0.0290031	UKB_afr
4194	phys_100000_0.00005	0.0385	UKB_afr
4963	phys_75000_0.00005	0.0426564	UKB_afr
6194	phys_50000_0.00005	0.0458821	UKB_afr
8787	phys_25000_0.00005	0.047255	UKB_afr
12528	phys_10000_0.00005	0.0438797	UKB_afr
15057	phys_5000_0.00005	0.0404344	UKB_afr
1654	genet_1_0.00005	0.0299544	UKB_afr
2500	genet_0.5_0.00005	0.0328909	UKB_afr
3309	genet_0.3_0.00005	0.0360618	UKB_afr
3521	genet_0.25_0.00005	0.0359938	UKB_afr
3834	genet_0.2_0.00005	0.0368733	UKB_afr
4589	genet_0.15_0.00005	0.0404841	UKB_afr
5598	genet_0.1_0.00005	0.0404635	UKB_afr
1412	phys_1000000_0.0005	0.0238291	UKB_afr
2246	phys_500000_0.0005	0.0308687	UKB_afr
6049	phys_100000_0.0005	0.0408417	UKB_afr
7185	phys_75000_0.0005	0.0448421	UKB_afr
8998	phys_50000_0.0005	0.0485246	UKB_afr
12709	phys_25000_0.0005	0.0509135	UKB_afr
18208	phys_10000_0.0005	0.048498	UKB_afr
21859	phys_5000_0.0005	0.044575	UKB_afr
2207	genet_1_0.0005	0.031342	UKB_afr
3521	genet_0.5_0.0005	0.0344142	UKB_afr
4720	genet_0.3_0.0005	0.038485	UKB_afr
5037	genet_0.25_0.0005	0.0379293	UKB_afr
5502	genet_0.2_0.0005	0.0392135	UKB_afr
6621	genet_0.15_0.0005	0.0423511	UKB_afr
8010	genet_0.1_0.0005	0.0430198	UKB_afr
51208	LD_250000_0.01_0.5	0.0478349	UKB_afr
52683	LD_100000_0.01_0.5	0.0469233	UKB_afr
54349	LD_50000_0.01_0.5	0.0464875	UKB_afr
2581	LD_block_0_0_AFR	0.0273952	UKB_afr
1703	LD_block_0_0_EUR	0.0264115	UKB_afr

## Sheet: 4
Nr	Name	Part_R2	Dataset
617	phys_1000000_0.00000005	0.173817	UKB_eur
842	phys_500000_0.00000005	0.18268	UKB_eur
1891	phys_100000_0.00000005	0.160721	UKB_eur
2213	phys_75000_0.00000005	0.157253	UKB_eur
2738	phys_50000_0.00000005	0.15227	UKB_eur
3888	phys_25000_0.00000005	0.142276	UKB_eur
5493	phys_10000_0.00000005	0.117715	UKB_eur
6633	phys_5000_0.00000005	0.0949343	UKB_eur
872	genet_1_0.00000005	0.167082	UKB_eur
1198	genet_0.5_0.00000005	0.153168	UKB_eur
1545	genet_0.3_0.00000005	0.150838	UKB_eur
1639	genet_0.25_0.00000005	0.151935	UKB_eur
1772	genet_0.2_0.00000005	0.148105	UKB_eur
2115	genet_0.15_0.00000005	0.138615	UKB_eur
2545	genet_0.1_0.00000005	0.125354	UKB_eur
711	phys_1000000_0.0000005	0.181854	UKB_eur
1001	phys_500000_0.0000005	0.191636	UKB_eur
2329	phys_100000_0.0000005	0.172512	UKB_eur
2725	phys_75000_0.0000005	0.168213	UKB_eur
3405	phys_50000_0.0000005	0.163421	UKB_eur
4818	phys_25000_0.0000005	0.153991	UKB_eur
6837	phys_10000_0.0000005	0.128666	UKB_eur
8235	phys_5000_0.0000005	0.104375	UKB_eur
1031	genet_1_0.0000005	0.17768	UKB_eur
1438	genet_0.5_0.0000005	0.163991	UKB_eur
1876	genet_0.3_0.0000005	0.160326	UKB_eur
1992	genet_0.25_0.0000005	0.16107	UKB_eur
2160	genet_0.2_0.0000005	0.15775	UKB_eur
2576	genet_0.15_0.0000005	0.149383	UKB_eur
3132	genet_0.1_0.0000005	0.136718	UKB_eur
854	phys_1000000_0.000005	0.190549	UKB_eur
1233	phys_500000_0.000005	0.203699	UKB_eur
2930	phys_100000_0.000005	0.184844	UKB_eur
3450	phys_75000_0.000005	0.18064	UKB_eur
4297	phys_50000_0.000005	0.176654	UKB_eur
6148	phys_25000_0.000005	0.166418	UKB_eur
8715	phys_10000_0.000005	0.141849	UKB_eur
10496	phys_5000_0.000005	0.11638	UKB_eur
1251	genet_1_0.000005	0.188515	UKB_eur
1784	genet_0.5_0.000005	0.174989	UKB_eur
2358	genet_0.3_0.000005	0.170905	UKB_eur
2497	genet_0.25_0.000005	0.17054	UKB_eur
2729	genet_0.2_0.000005	0.168315	UKB_eur
3249	genet_0.15_0.000005	0.161383	UKB_eur
3954	genet_0.1_0.000005	0.148604	UKB_eur
1045	phys_1000000_0.00005	0.195026	UKB_eur
1568	phys_500000_0.00005	0.210931	UKB_eur
3899	phys_100000_0.00005	0.201307	UKB_eur
4626	phys_75000_0.00005	0.197669	UKB_eur
5762	phys_50000_0.00005	0.194088	UKB_eur
8223	phys_25000_0.00005	0.183164	UKB_eur
11779	phys_10000_0.00005	0.159301	UKB_eur
14205	phys_5000_0.00005	0.132001	UKB_eur
1571	genet_1_0.00005	0.197244	UKB_eur
2336	genet_0.5_0.00005	0.187513	UKB_eur
3070	genet_0.3_0.00005	0.184352	UKB_eur
3273	genet_0.25_0.00005	0.184379	UKB_eur
3601	genet_0.2_0.00005	0.183205	UKB_eur
4307	genet_0.15_0.00005	0.176741	UKB_eur
5244	genet_0.1_0.00005	0.164273	UKB_eur
1380	phys_1000000_0.0005	0.204595	UKB_eur
2181	phys_500000_0.0005	0.227078	UKB_eur
5805	phys_100000_0.0005	0.225137	UKB_eur
6852	phys_75000_0.0005	0.221898	UKB_eur
8537	phys_50000_0.0005	0.217556	UKB_eur
12113	phys_25000_0.0005	0.207038	UKB_eur
17407	phys_10000_0.0005	0.183365	UKB_eur
20976	phys_5000_0.0005	0.153377	UKB_eur
2150	genet_1_0.0005	0.211332	UKB_eur
3380	genet_0.5_0.0005	0.205057	UKB_eur
4509	genet_0.3_0.0005	0.204439	UKB_eur
4814	genet_0.25_0.0005	0.205031	UKB_eur
5285	genet_0.2_0.0005	0.201957	UKB_eur
6316	genet_0.15_0.0005	0.195998	UKB_eur
7621	genet_0.1_0.0005	0.184207	UKB_eur
39413	LD_250000_0.01_0.5	0.279278	UKB_eur
41667	LD_100000_0.01_0.5	0.255897	UKB_eur
44442	LD_50000_0.01_0.5	0.22631	UKB_eur
2581	LD_block_0_0_AFR	0.23285	UKB_eur
1703	LD_block_0_0_EUR	0.208189	UKB_eur

## Sheet: 5
Nr	Name	Part_R2	Dataset
719	phys_1000000_0.00000005	0.0264672	HRS_afr
999	phys_500000_0.00000005	0.0293066	HRS_afr
2433	phys_100000_0.00000005	0.0264589	HRS_afr
2947	phys_75000_0.00000005	0.0268538	HRS_afr
3815	phys_50000_0.00000005	0.0266254	HRS_afr
5991	phys_25000_0.00000005	0.0268833	HRS_afr
10115	phys_10000_0.00000005	0.0262845	HRS_afr
13923	phys_5000_0.00000005	0.0267021	HRS_afr
1026	genet_1_0.00000005	0.0252225	HRS_afr
1463	genet_0.5_0.00000005	0.0229918	HRS_afr
1936	genet_0.3_0.00000005	0.0214831	HRS_afr
2055	genet_0.25_0.00000005	0.0205128	HRS_afr
2295	genet_0.2_0.00000005	0.0208114	HRS_afr
2814	genet_0.15_0.00000005	0.020779	HRS_afr
3538	genet_0.1_0.00000005	0.0185998	HRS_afr
831	phys_1000000_0.0000005	0.0271737	HRS_afr
1191	phys_500000_0.0000005	0.0318544	HRS_afr
2955	phys_100000_0.0000005	0.0296452	HRS_afr
3584	phys_75000_0.0000005	0.0306104	HRS_afr
4622	phys_50000_0.0000005	0.0302919	HRS_afr
7308	phys_25000_0.0000005	0.0305214	HRS_afr
12352	phys_10000_0.0000005	0.0297612	HRS_afr
17052	phys_5000_0.0000005	0.0300792	HRS_afr
1210	genet_1_0.0000005	0.0270994	HRS_afr
1765	genet_0.5_0.0000005	0.0262192	HRS_afr
2354	genet_0.3_0.0000005	0.0266221	HRS_afr
2506	genet_0.25_0.0000005	0.0256169	HRS_afr
2790	genet_0.2_0.0000005	0.0259565	HRS_afr
3398	genet_0.15_0.0000005	0.0245878	HRS_afr
4284	genet_0.1_0.0000005	0.0213387	HRS_afr
988	phys_1000000_0.000005	0.029538	HRS_afr
1446	phys_500000_0.000005	0.0331654	HRS_afr
3685	phys_100000_0.000005	0.0311725	HRS_afr
4484	phys_75000_0.000005	0.0315656	HRS_afr
5820	phys_50000_0.000005	0.0321622	HRS_afr
9155	phys_25000_0.000005	0.0311238	HRS_afr
15547	phys_10000_0.000005	0.0315479	HRS_afr
21561	phys_5000_0.000005	0.0318785	HRS_afr
1457	genet_1_0.000005	0.0278054	HRS_afr
2158	genet_0.5_0.000005	0.0275225	HRS_afr
2919	genet_0.3_0.000005	0.0271857	HRS_afr
3120	genet_0.25_0.000005	0.0273899	HRS_afr
3483	genet_0.2_0.000005	0.026798	HRS_afr
4249	genet_0.15_0.000005	0.0261455	HRS_afr
5353	genet_0.1_0.000005	0.023068	HRS_afr
1195	phys_1000000_0.00005	0.0311439	HRS_afr
1837	phys_500000_0.00005	0.036177	HRS_afr
4914	phys_100000_0.00005	0.0316872	HRS_afr
5960	phys_75000_0.00005	0.0330991	HRS_afr
7713	phys_50000_0.00005	0.034045	HRS_afr
12099	phys_25000_0.00005	0.0331314	HRS_afr
20604	phys_10000_0.00005	0.0339348	HRS_afr
28654	phys_5000_0.00005	0.0343021	HRS_afr
1837	genet_1_0.00005	0.029466	HRS_afr
2839	genet_0.5_0.00005	0.0303138	HRS_afr
3845	genet_0.3_0.00005	0.0275008	HRS_afr
4105	genet_0.25_0.00005	0.0288338	HRS_afr
4586	genet_0.2_0.00005	0.0276028	HRS_afr
5612	genet_0.15_0.00005	0.0273981	HRS_afr
7057	genet_0.1_0.00005	0.0245134	HRS_afr
1499	phys_1000000_0.0005	0.030731	HRS_afr
2465	phys_500000_0.0005	0.0350654	HRS_afr
7101	phys_100000_0.0005	0.0310346	HRS_afr
8555	phys_75000_0.0005	0.0330095	HRS_afr
11120	phys_50000_0.0005	0.0352507	HRS_afr
17414	phys_25000_0.0005	0.0355625	HRS_afr
29590	phys_10000_0.0005	0.0369624	HRS_afr
41228	phys_5000_0.0005	0.0381476	HRS_afr
2431	genet_1_0.0005	0.029444	HRS_afr
3958	genet_0.5_0.0005	0.0287679	HRS_afr
5442	genet_0.3_0.0005	0.0269279	HRS_afr
5872	genet_0.25_0.0005	0.0287841	HRS_afr
6556	genet_0.2_0.0005	0.0284856	HRS_afr
8033	genet_0.15_0.0005	0.0271827	HRS_afr
10060	genet_0.1_0.0005	0.0235222	HRS_afr
96031	LD_250000_0.01_0.5	0.0505953	HRS_afr
98561	LD_100000_0.01_0.5	0.0493474	HRS_afr
102861	LD_50000_0.01_0.5	0.0470346	HRS_afr
2586	LD_block_0_0_AFR	0.0298352	HRS_afr
1706	LD_block_0_0_EUR	0.0286593	HRS_afr

## Sheet: 6
Nr	Name	Part_R2	Dataset
719	phys_1000000_0.00000005	0.13412	HRS_eur
1000	phys_500000_0.00000005	0.147001	HRS_eur
2439	phys_100000_0.00000005	0.126809	HRS_eur
2953	phys_75000_0.00000005	0.12443	HRS_eur
3838	phys_50000_0.00000005	0.119558	HRS_eur
6021	phys_25000_0.00000005	0.114763	HRS_eur
10209	phys_10000_0.00000005	0.110214	HRS_eur
14077	phys_5000_0.00000005	0.108458	HRS_eur
1027	genet_1_0.00000005	0.134271	HRS_eur
1464	genet_0.5_0.00000005	0.121974	HRS_eur
1944	genet_0.3_0.00000005	0.119945	HRS_eur
2062	genet_0.25_0.00000005	0.119876	HRS_eur
2299	genet_0.2_0.00000005	0.116431	HRS_eur
2818	genet_0.15_0.00000005	0.109807	HRS_eur
3550	genet_0.1_0.00000005	0.10442	HRS_eur
829	phys_1000000_0.0000005	0.136356	HRS_eur
1195	phys_500000_0.0000005	0.148115	HRS_eur
2966	phys_100000_0.0000005	0.131668	HRS_eur
3595	phys_75000_0.0000005	0.129227	HRS_eur
4654	phys_50000_0.0000005	0.123582	HRS_eur
7350	phys_25000_0.0000005	0.120076	HRS_eur
12466	phys_10000_0.0000005	0.116405	HRS_eur
17240	phys_5000_0.0000005	0.114538	HRS_eur
1213	genet_1_0.0000005	0.13775	HRS_eur
1766	genet_0.5_0.0000005	0.125697	HRS_eur
2365	genet_0.3_0.0000005	0.124102	HRS_eur
2517	genet_0.25_0.0000005	0.124773	HRS_eur
2802	genet_0.2_0.0000005	0.120536	HRS_eur
3407	genet_0.15_0.0000005	0.114063	HRS_eur
4300	genet_0.1_0.0000005	0.109996	HRS_eur
989	phys_1000000_0.000005	0.13839	HRS_eur
1447	phys_500000_0.000005	0.152245	HRS_eur
3699	phys_100000_0.000005	0.13891	HRS_eur
4500	phys_75000_0.000005	0.136932	HRS_eur
5856	phys_50000_0.000005	0.131126	HRS_eur
9206	phys_25000_0.000005	0.127376	HRS_eur
15680	phys_10000_0.000005	0.123541	HRS_eur
21784	phys_5000_0.000005	0.121616	HRS_eur
1459	genet_1_0.000005	0.13999	HRS_eur
2164	genet_0.5_0.000005	0.131628	HRS_eur
2930	genet_0.3_0.000005	0.12884	HRS_eur
3136	genet_0.25_0.000005	0.130087	HRS_eur
3498	genet_0.2_0.000005	0.126197	HRS_eur
4264	genet_0.15_0.000005	0.119856	HRS_eur
5372	genet_0.1_0.000005	0.116423	HRS_eur
1194	phys_1000000_0.00005	0.140936	HRS_eur
1840	phys_500000_0.00005	0.154891	HRS_eur
4928	phys_100000_0.00005	0.1474	HRS_eur
5985	phys_75000_0.00005	0.146335	HRS_eur
7758	phys_50000_0.00005	0.141732	HRS_eur
12164	phys_25000_0.00005	0.137018	HRS_eur
20773	phys_10000_0.00005	0.133683	HRS_eur
28953	phys_5000_0.00005	0.13194	HRS_eur
1838	genet_1_0.00005	0.143953	HRS_eur
2843	genet_0.5_0.00005	0.137846	HRS_eur
3861	genet_0.3_0.00005	0.135899	HRS_eur
4122	genet_0.25_0.00005	0.137911	HRS_eur
4603	genet_0.2_0.00005	0.133879	HRS_eur
5632	genet_0.15_0.00005	0.127417	HRS_eur
7086	genet_0.1_0.00005	0.12555	HRS_eur
1499	phys_1000000_0.0005	0.141329	HRS_eur
2468	phys_500000_0.0005	0.155488	HRS_eur
7117	phys_100000_0.0005	0.156367	HRS_eur
8589	phys_75000_0.0005	0.155485	HRS_eur
11172	phys_50000_0.0005	0.151419	HRS_eur
17498	phys_25000_0.0005	0.147917	HRS_eur
29799	phys_10000_0.0005	0.145434	HRS_eur
41616	phys_5000_0.0005	0.144099	HRS_eur
2434	genet_1_0.0005	0.144059	HRS_eur
3961	genet_0.5_0.0005	0.143958	HRS_eur
5452	genet_0.3_0.0005	0.142832	HRS_eur
5885	genet_0.25_0.0005	0.145607	HRS_eur
6571	genet_0.2_0.0005	0.141107	HRS_eur
8051	genet_0.15_0.0005	0.135433	HRS_eur
10094	genet_0.1_0.0005	0.134314	HRS_eur
59266	LD_250000_0.01_0.5	0.189223	HRS_eur
62903	LD_100000_0.01_0.5	0.180841	HRS_eur
69298	LD_50000_0.01_0.5	0.171554	HRS_eur
2586	LD_block_0_0_AFR	0.140951	HRS_eur
1706	LD_block_0_0_EUR	0.142345	HRS_eur

## Sheet: 7
Nr	Name	Part_R2	Dataset
676	phys_1000000_0.00000005	0.0283745	WHI_afr(sib)
894	phys_500000_0.00000005	0.028855	WHI_afr(sib)
1986	phys_100000_0.00000005	0.0255808	WHI_afr(sib)
2369	phys_75000_0.00000005	0.026419	WHI_afr(sib)
3036	phys_50000_0.00000005	0.0260242	WHI_afr(sib)
4578	phys_25000_0.00000005	0.0285291	WHI_afr(sib)
7239	phys_10000_0.00000005	0.0285851	WHI_afr(sib)
9361	phys_5000_0.00000005	0.02938	WHI_afr(sib)
896	genet_1_0.00000005	0.0272084	WHI_afr(sib)
1219	genet_0.5_0.00000005	0.0292845	WHI_afr(sib)
1579	genet_0.3_0.00000005	0.0287574	WHI_afr(sib)
1674	genet_0.25_0.00000005	0.0266405	WHI_afr(sib)
1848	genet_0.2_0.00000005	0.0258674	WHI_afr(sib)
2219	genet_0.15_0.00000005	0.0279797	WHI_afr(sib)
2730	genet_0.1_0.00000005	0.0253634	WHI_afr(sib)
770	phys_1000000_0.0000005	0.0292792	WHI_afr(sib)
1060	phys_500000_0.0000005	0.0289138	WHI_afr(sib)
2428	phys_100000_0.0000005	0.0255418	WHI_afr(sib)
2874	phys_75000_0.0000005	0.0274409	WHI_afr(sib)
3678	phys_50000_0.0000005	0.0266019	WHI_afr(sib)
5566	phys_25000_0.0000005	0.0298168	WHI_afr(sib)
8786	phys_10000_0.0000005	0.0299111	WHI_afr(sib)
11386	phys_5000_0.0000005	0.0311594	WHI_afr(sib)
1045	genet_1_0.0000005	0.0284385	WHI_afr(sib)
1485	genet_0.5_0.0000005	0.0303492	WHI_afr(sib)
1916	genet_0.3_0.0000005	0.028453	WHI_afr(sib)
2041	genet_0.25_0.0000005	0.0263344	WHI_afr(sib)
2257	genet_0.2_0.0000005	0.0261235	WHI_afr(sib)
2711	genet_0.15_0.0000005	0.028019	WHI_afr(sib)
3328	genet_0.1_0.0000005	0.0260439	WHI_afr(sib)
914	phys_1000000_0.000005	0.0273329	WHI_afr(sib)
1288	phys_500000_0.000005	0.0267936	WHI_afr(sib)
3028	phys_100000_0.000005	0.0247324	WHI_afr(sib)
3600	phys_75000_0.000005	0.0261417	WHI_afr(sib)
4623	phys_50000_0.000005	0.0253405	WHI_afr(sib)
6979	phys_25000_0.000005	0.0286909	WHI_afr(sib)
11060	phys_10000_0.000005	0.0298241	WHI_afr(sib)
14327	phys_5000_0.000005	0.0309166	WHI_afr(sib)
1276	genet_1_0.000005	0.0259602	WHI_afr(sib)
1820	genet_0.5_0.000005	0.0278966	WHI_afr(sib)
2382	genet_0.3_0.000005	0.0266047	WHI_afr(sib)
2525	genet_0.25_0.000005	0.0245119	WHI_afr(sib)
2812	genet_0.2_0.000005	0.0248197	WHI_afr(sib)
3361	genet_0.15_0.000005	0.0263324	WHI_afr(sib)
4142	genet_0.1_0.000005	0.0245217	WHI_afr(sib)
1104	phys_1000000_0.00005	0.0250498	WHI_afr(sib)
1629	phys_500000_0.00005	0.0223371	WHI_afr(sib)
3977	phys_100000_0.00005	0.0230698	WHI_afr(sib)
4741	phys_75000_0.00005	0.0248243	WHI_afr(sib)
6049	phys_50000_0.00005	0.0249336	WHI_afr(sib)
9159	phys_25000_0.00005	0.0286438	WHI_afr(sib)
14616	phys_10000_0.00005	0.0303928	WHI_afr(sib)
18998	phys_5000_0.00005	0.0314665	WHI_afr(sib)
1595	genet_1_0.00005	0.0225209	WHI_afr(sib)
2357	genet_0.5_0.00005	0.0240284	WHI_afr(sib)
3111	genet_0.3_0.00005	0.0238395	WHI_afr(sib)
3301	genet_0.25_0.00005	0.0223817	WHI_afr(sib)
3665	genet_0.2_0.00005	0.0226173	WHI_afr(sib)
4392	genet_0.15_0.00005	0.0250136	WHI_afr(sib)
5451	genet_0.1_0.00005	0.0240062	WHI_afr(sib)
1377	phys_1000000_0.0005	0.0232435	WHI_afr(sib)
2160	phys_500000_0.0005	0.0212682	WHI_afr(sib)
5700	phys_100000_0.0005	0.0231194	WHI_afr(sib)
6742	phys_75000_0.0005	0.02401	WHI_afr(sib)
8666	phys_50000_0.0005	0.0239128	WHI_afr(sib)
13082	phys_25000_0.0005	0.0282007	WHI_afr(sib)
20937	phys_10000_0.0005	0.0301802	WHI_afr(sib)
27244	phys_5000_0.0005	0.0309872	WHI_afr(sib)
2112	genet_1_0.0005	0.0207596	WHI_afr(sib)
3273	genet_0.5_0.0005	0.0233531	WHI_afr(sib)
4373	genet_0.3_0.0005	0.0232551	WHI_afr(sib)
4668	genet_0.25_0.0005	0.023287	WHI_afr(sib)
5183	genet_0.2_0.0005	0.0224226	WHI_afr(sib)
6232	genet_0.15_0.0005	0.0250941	WHI_afr(sib)
7713	genet_0.1_0.0005	0.0244087	WHI_afr(sib)
51742	LD_250000_0.01_0.5	0.0281766	WHI_afr(sib)
53034	LD_100000_0.01_0.5	0.028665	WHI_afr(sib)
55633	LD_50000_0.01_0.5	0.0285901	WHI_afr(sib)
2585	LD_block_0_0_AFR	0.0183296	WHI_afr(sib)
1701	LD_block_0_0_EUR	0.0190863	WHI_afr(sib)

## Sheet: 8
Nr	Name	Part_R2	Dataset
671	phys_1000000_0.00000005	0.0193469	JHS_afr(sib)
886	phys_500000_0.00000005	0.0306678	JHS_afr(sib)
1957	phys_100000_0.00000005	0.0286623	JHS_afr(sib)
2325	phys_75000_0.00000005	0.0260225	JHS_afr(sib)
2980	phys_50000_0.00000005	0.0257623	JHS_afr(sib)
4451	phys_25000_0.00000005	0.0236931	JHS_afr(sib)
6996	phys_10000_0.00000005	0.0275216	JHS_afr(sib)
8979	phys_5000_0.00000005	0.0255534	JHS_afr(sib)
886	genet_1_0.00000005	0.0208701	JHS_afr(sib)
1201	genet_0.5_0.00000005	0.0180128	JHS_afr(sib)
1555	genet_0.3_0.00000005	0.0273667	JHS_afr(sib)
1648	genet_0.25_0.00000005	0.0258083	JHS_afr(sib)
1822	genet_0.2_0.00000005	0.0226746	JHS_afr(sib)
2183	genet_0.15_0.00000005	0.0250359	JHS_afr(sib)
2677	genet_0.1_0.00000005	0.021435	JHS_afr(sib)
760	phys_1000000_0.0000005	0.0196529	JHS_afr(sib)
1049	phys_500000_0.0000005	0.032813	JHS_afr(sib)
2396	phys_100000_0.0000005	0.0316959	JHS_afr(sib)
2830	phys_75000_0.0000005	0.0313393	JHS_afr(sib)
3620	phys_50000_0.0000005	0.029217	JHS_afr(sib)
5421	phys_25000_0.0000005	0.0266226	JHS_afr(sib)
8490	phys_10000_0.0000005	0.0296438	JHS_afr(sib)
10913	phys_5000_0.0000005	0.0279833	JHS_afr(sib)
1032	genet_1_0.0000005	0.0219837	JHS_afr(sib)
1458	genet_0.5_0.0000005	0.0216545	JHS_afr(sib)
1886	genet_0.3_0.0000005	0.029534	JHS_afr(sib)
2012	genet_0.25_0.0000005	0.0293138	JHS_afr(sib)
2228	genet_0.2_0.0000005	0.027347	JHS_afr(sib)
2671	genet_0.15_0.0000005	0.0280546	JHS_afr(sib)
3268	genet_0.1_0.0000005	0.0240393	JHS_afr(sib)
902	phys_1000000_0.000005	0.0204485	JHS_afr(sib)
1277	phys_500000_0.000005	0.0342887	JHS_afr(sib)
2987	phys_100000_0.000005	0.0358043	JHS_afr(sib)
3548	phys_75000_0.000005	0.033	JHS_afr(sib)
4541	phys_50000_0.000005	0.0324781	JHS_afr(sib)
6790	phys_25000_0.000005	0.0296345	JHS_afr(sib)
10682	phys_10000_0.000005	0.0327992	JHS_afr(sib)
13743	phys_5000_0.000005	0.030807	JHS_afr(sib)
1261	genet_1_0.000005	0.0263133	JHS_afr(sib)
1790	genet_0.5_0.000005	0.0234134	JHS_afr(sib)
2350	genet_0.3_0.000005	0.0347791	JHS_afr(sib)
2492	genet_0.25_0.000005	0.0362186	JHS_afr(sib)
2776	genet_0.2_0.000005	0.0307741	JHS_afr(sib)
3307	genet_0.15_0.000005	0.033178	JHS_afr(sib)
4070	genet_0.1_0.000005	0.0280483	JHS_afr(sib)
1093	phys_1000000_0.00005	0.0206238	JHS_afr(sib)
1618	phys_500000_0.00005	0.0373836	JHS_afr(sib)
3928	phys_100000_0.00005	0.0393602	JHS_afr(sib)
4693	phys_75000_0.00005	0.0348784	JHS_afr(sib)
5968	phys_50000_0.00005	0.0336755	JHS_afr(sib)
8947	phys_25000_0.00005	0.0319016	JHS_afr(sib)
14141	phys_10000_0.00005	0.0347071	JHS_afr(sib)
18265	phys_5000_0.00005	0.0330597	JHS_afr(sib)
1581	genet_1_0.00005	0.0279951	JHS_afr(sib)
2328	genet_0.5_0.00005	0.0263229	JHS_afr(sib)
3081	genet_0.3_0.00005	0.0376074	JHS_afr(sib)
3269	genet_0.25_0.00005	0.0377866	JHS_afr(sib)
3626	genet_0.2_0.00005	0.0335113	JHS_afr(sib)
4342	genet_0.15_0.00005	0.0348494	JHS_afr(sib)
5367	genet_0.1_0.00005	0.0317926	JHS_afr(sib)
1366	phys_1000000_0.0005	0.0222912	JHS_afr(sib)
2151	phys_500000_0.0005	0.0340351	JHS_afr(sib)
5631	phys_100000_0.0005	0.0361183	JHS_afr(sib)
6667	phys_75000_0.0005	0.0313468	JHS_afr(sib)
8538	phys_50000_0.0005	0.031173	JHS_afr(sib)
12795	phys_25000_0.0005	0.0321224	JHS_afr(sib)
20304	phys_10000_0.0005	0.0375517	JHS_afr(sib)
26221	phys_5000_0.0005	0.0349392	JHS_afr(sib)
2098	genet_1_0.0005	0.0265021	JHS_afr(sib)
3240	genet_0.5_0.0005	0.0246514	JHS_afr(sib)
4326	genet_0.3_0.0005	0.0342898	JHS_afr(sib)
4617	genet_0.25_0.0005	0.0356891	JHS_afr(sib)
5129	genet_0.2_0.0005	0.0308886	JHS_afr(sib)
6157	genet_0.15_0.0005	0.0299963	JHS_afr(sib)
7599	genet_0.1_0.0005	0.0281485	JHS_afr(sib)
50367	LD_250000_0.01_0.5	1.1208e-05	JHS_afr(sib)
51618	LD_100000_0.01_0.5	2.53591e-05	JHS_afr(sib)
54053	LD_50000_0.01_0.5	5.71902e-05	JHS_afr(sib)
2576	LD_block_0_0_AFR	0.0217751	JHS_afr(sib)
1695	LD_block_0_0_EUR	0.0207987	JHS_afr(sib)

## Sheet: 9
Nr	Name	Part_R2	Dataset
565	phys_1000000_0.00000005	0.0207144	UKB_afr(sib)
736	phys_500000_0.00000005	0.0233097	UKB_afr(sib)
1429	phys_100000_0.00000005	0.0249843	UKB_afr(sib)
1619	phys_75000_0.00000005	0.0258039	UKB_afr(sib)
1921	phys_50000_0.00000005	0.0268098	UKB_afr(sib)
2446	phys_25000_0.00000005	0.0266503	UKB_afr(sib)
3036	phys_10000_0.00000005	0.0298983	UKB_afr(sib)
3352	phys_5000_0.00000005	0.0313546	UKB_afr(sib)
749	genet_1_0.00000005	0.0243085	UKB_afr(sib)
978	genet_0.5_0.00000005	0.0251467	UKB_afr(sib)
1185	genet_0.3_0.00000005	0.0259286	UKB_afr(sib)
1245	genet_0.25_0.00000005	0.0255929	UKB_afr(sib)
1334	genet_0.2_0.00000005	0.0264621	UKB_afr(sib)
1540	genet_0.15_0.00000005	0.0279663	UKB_afr(sib)
1766	genet_0.1_0.00000005	0.026892	UKB_afr(sib)
638	phys_1000000_0.0000005	0.0221437	UKB_afr(sib)
863	phys_500000_0.0000005	0.0235078	UKB_afr(sib)
1712	phys_100000_0.0000005	0.0257949	UKB_afr(sib)
1934	phys_75000_0.0000005	0.0262498	UKB_afr(sib)
2307	phys_50000_0.0000005	0.0268032	UKB_afr(sib)
2954	phys_25000_0.0000005	0.0269518	UKB_afr(sib)
3681	phys_10000_0.0000005	0.03001	UKB_afr(sib)
4083	phys_5000_0.0000005	0.0311586	UKB_afr(sib)
860	genet_1_0.0000005	0.0249038	UKB_afr(sib)
1165	genet_0.5_0.0000005	0.0255849	UKB_afr(sib)
1416	genet_0.3_0.0000005	0.0269559	UKB_afr(sib)
1489	genet_0.25_0.0000005	0.0265765	UKB_afr(sib)
1589	genet_0.2_0.0000005	0.026878	UKB_afr(sib)
1840	genet_0.15_0.0000005	0.0279835	UKB_afr(sib)
2119	genet_0.1_0.0000005	0.026135	UKB_afr(sib)
749	phys_1000000_0.000005	0.0213263	UKB_afr(sib)
1043	phys_500000_0.000005	0.0230184	UKB_afr(sib)
2110	phys_100000_0.000005	0.0250814	UKB_afr(sib)
2389	phys_75000_0.000005	0.0255775	UKB_afr(sib)
2857	phys_50000_0.000005	0.0261666	UKB_afr(sib)
3675	phys_25000_0.000005	0.0260103	UKB_afr(sib)
4599	phys_10000_0.000005	0.029553	UKB_afr(sib)
5087	phys_5000_0.000005	0.0308531	UKB_afr(sib)
1029	genet_1_0.000005	0.0241549	UKB_afr(sib)
1413	genet_0.5_0.000005	0.0252997	UKB_afr(sib)
1737	genet_0.3_0.000005	0.0258755	UKB_afr(sib)
1823	genet_0.25_0.000005	0.0255634	UKB_afr(sib)
1958	genet_0.2_0.000005	0.0257431	UKB_afr(sib)
2264	genet_0.15_0.000005	0.0272283	UKB_afr(sib)
2618	genet_0.1_0.000005	0.0258038	UKB_afr(sib)
911	phys_1000000_0.00005	0.0211037	UKB_afr(sib)
1309	phys_500000_0.00005	0.0206083	UKB_afr(sib)
2802	phys_100000_0.00005	0.023998	UKB_afr(sib)
3189	phys_75000_0.00005	0.024474	UKB_afr(sib)
3811	phys_50000_0.00005	0.0255782	UKB_afr(sib)
4889	phys_25000_0.00005	0.0258948	UKB_afr(sib)
6157	phys_10000_0.00005	0.0289851	UKB_afr(sib)
6807	phys_5000_0.00005	0.0307082	UKB_afr(sib)
1284	genet_1_0.00005	0.0220783	UKB_afr(sib)
1830	genet_0.5_0.00005	0.022978	UKB_afr(sib)
2272	genet_0.3_0.00005	0.0243996	UKB_afr(sib)
2384	genet_0.25_0.00005	0.0242586	UKB_afr(sib)
2565	genet_0.2_0.00005	0.024152	UKB_afr(sib)
2957	genet_0.15_0.00005	0.0256163	UKB_afr(sib)
3421	genet_0.1_0.00005	0.0256501	UKB_afr(sib)
1139	phys_1000000_0.0005	0.0204968	UKB_afr(sib)
1739	phys_500000_0.0005	0.0208803	UKB_afr(sib)
3934	phys_100000_0.0005	0.0225969	UKB_afr(sib)
4512	phys_75000_0.0005	0.0229514	UKB_afr(sib)
5377	phys_50000_0.0005	0.0242093	UKB_afr(sib)
6892	phys_25000_0.0005	0.0255017	UKB_afr(sib)
8687	phys_10000_0.0005	0.0284498	UKB_afr(sib)
9641	phys_5000_0.0005	0.030156	UKB_afr(sib)
1678	genet_1_0.0005	0.0207727	UKB_afr(sib)
2500	genet_0.5_0.0005	0.0217845	UKB_afr(sib)
3125	genet_0.3_0.0005	0.0236523	UKB_afr(sib)
3312	genet_0.25_0.0005	0.0234255	UKB_afr(sib)
3564	genet_0.2_0.0005	0.0236166	UKB_afr(sib)
4129	genet_0.15_0.0005	0.0245846	UKB_afr(sib)
4794	genet_0.1_0.0005	0.0244452	UKB_afr(sib)
18983	LD_250000_0.01_0.5	0.0252361	UKB_afr(sib)
19255	LD_100000_0.01_0.5	0.0250881	UKB_afr(sib)
19618	LD_50000_0.01_0.5	0.0262081	UKB_afr(sib)
2569	LD_block_0_0_AFR	0.016074	UKB_afr(sib)
1694	LD_block_0_0_EUR	0.0138168	UKB_afr(sib)

[truncated: 11 more sheets: 10, 11, 12, 13, 14, 15, 16, 17, 18, 19, 20]
